# Supplementary material
Source: PubMed Central journal article supplement (PMC5629263)
Supplement: 10.1074_M117.066944_mcp.M117.066944-1.pdf [file 10.1074_M117.066944_mcp.M117.066944-1.pdf]

Supplementary Figures

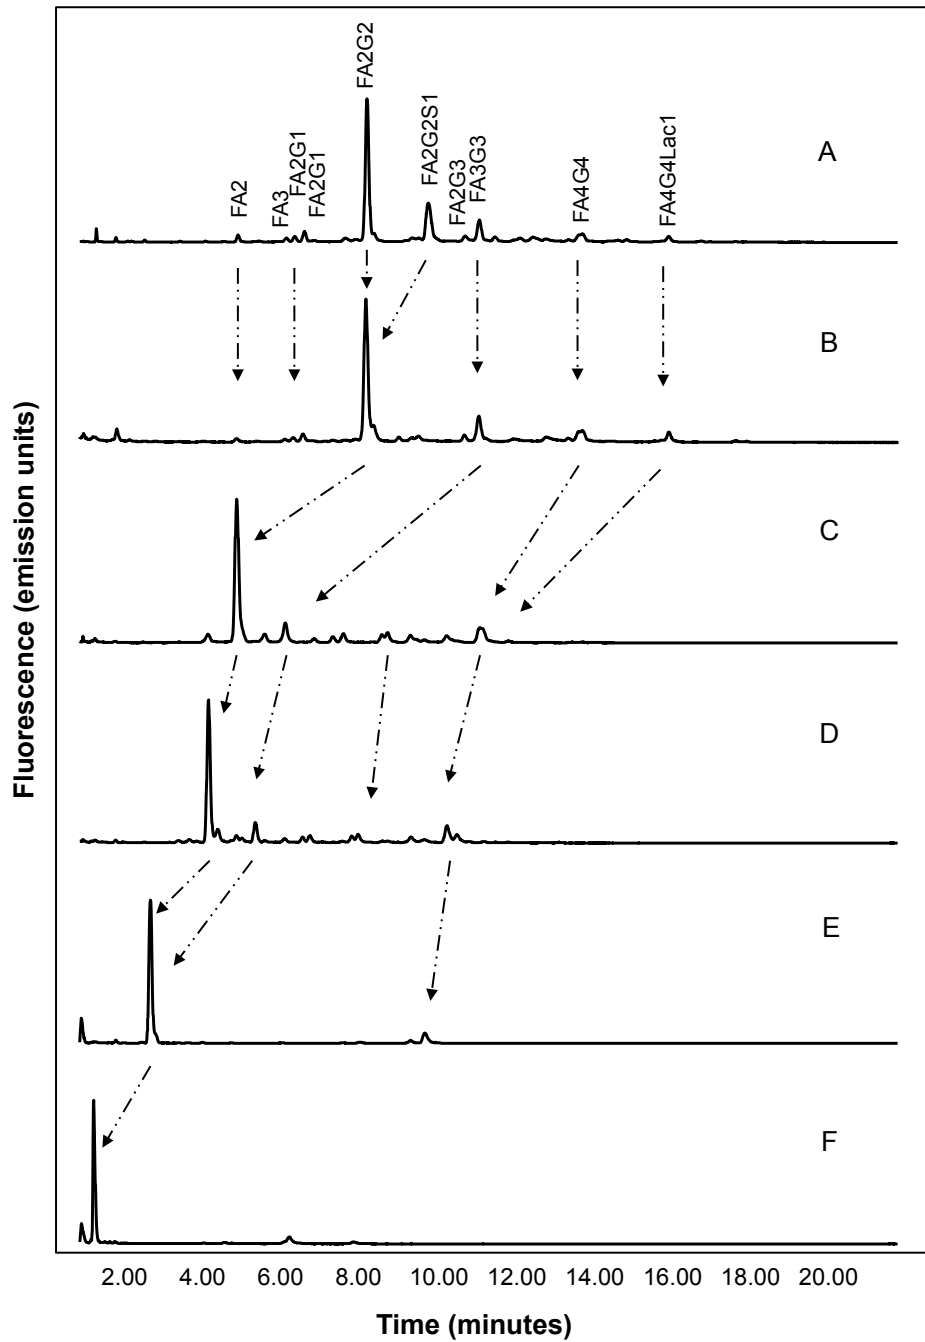

Figure 1. Exoglycosidase sequencing of the *FcγRIIIa* Arg131 N-glycans

Arrows indicate the migrations of peaks following exoglycosidase digestion and HILIC UPLC analysis A. Undigested *FcγRIIIa* Arg131 glycan profile B. *Arthrobacter ureafaciens* sialidase (ABS) C. bovine testes  $\beta$ -galactosidase (BTG) D. bovine kidney  $\alpha$ -fucosidase (BKF), E. jack bean  $\beta$ -N-acetylhexosaminidase (JBH), F. jack bean  $\alpha$ -mannosidase (JBM). Peaks migrate to Man<sub>1</sub> structures following digestion.

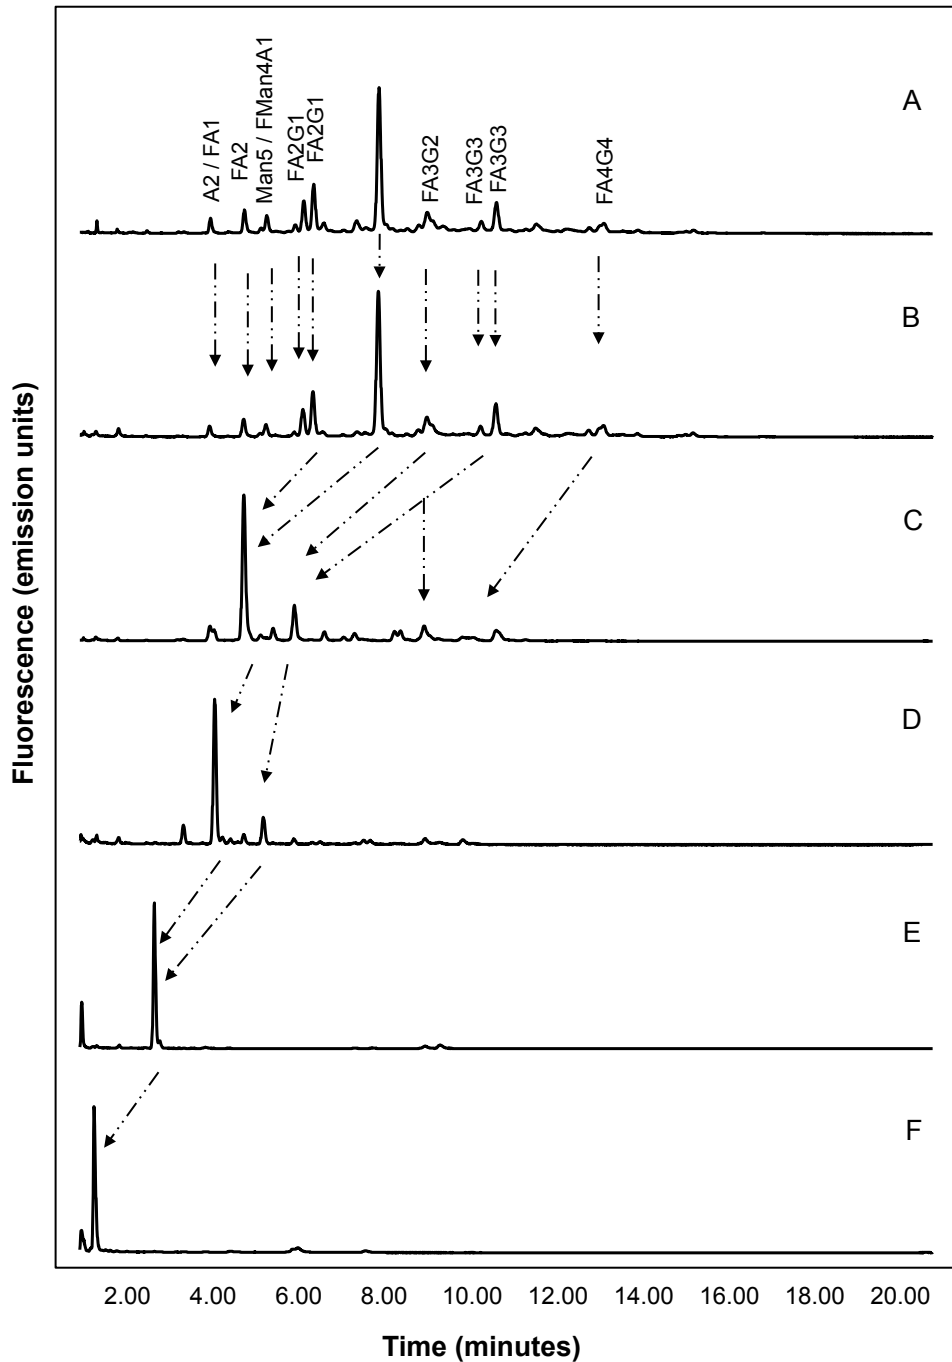

Figure 2. Exoglycosidase sequencing of the *FcγRIIa*<sub>His131</sub> N-glycans

Arrows indicate the migrations of peaks following exoglycosidase digestion and HILIC UPLC analysis A. Undigested *FcγRIIa*<sub>His131</sub> glycan profile B. *Arthrobacter ureafaciens* sialidase (ABS) C. bovine testes  $\beta$ -galactosidase (BTG) D. bovine kidney  $\alpha$ -fucosidase (BKF), E. jack bean  $\beta$ -N-acetylhexosaminidase (JBH), F. jack bean  $\alpha$ -mannosidase (JBM). Peaks migrate to Man<sub>1</sub> structures following digestion.

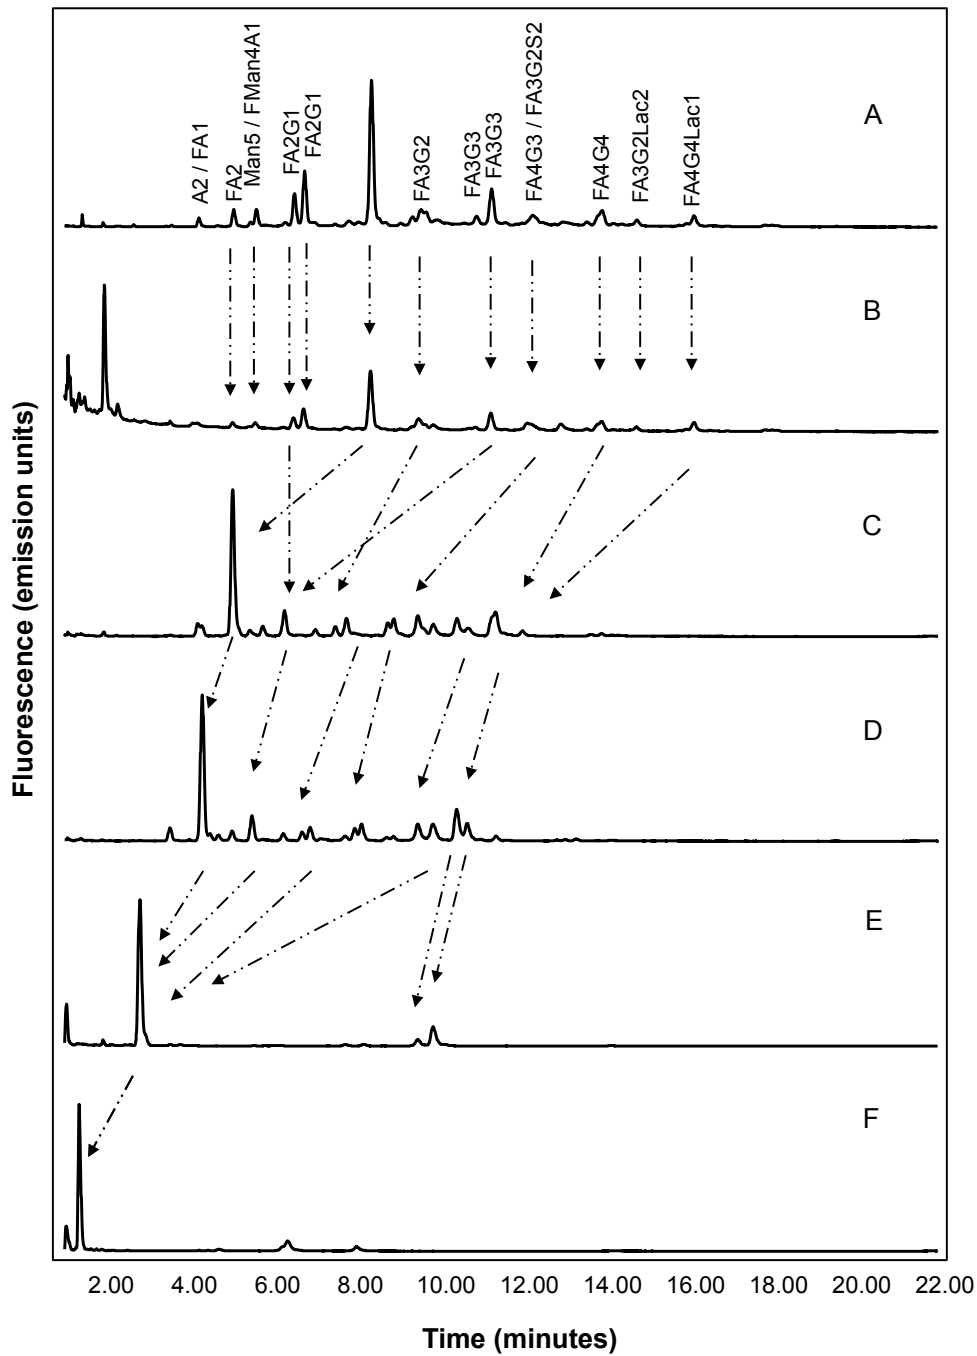

Figure 3. Exoglycosidase sequencing of the Fc $\gamma$ RIIb N-glycans

Arrows indicate the migrations of peaks following exoglycosidase digestion and HILIC UPLC analysis A. Undigested Fc $\gamma$ RIIb glycan profile B. *Arthrobacter ureafaciens* sialidase (ABS) C. bovine testes  $\beta$ -galactosidase (BTG) D. bovine kidney  $\alpha$ -fucosidase (BKF), E. jack bean  $\beta$ -N-acetylhexosaminidase (JBH), F. jack bean  $\alpha$ -mannosidase (JBM). Peaks migrate to Man<sub>1</sub> structures following digestion

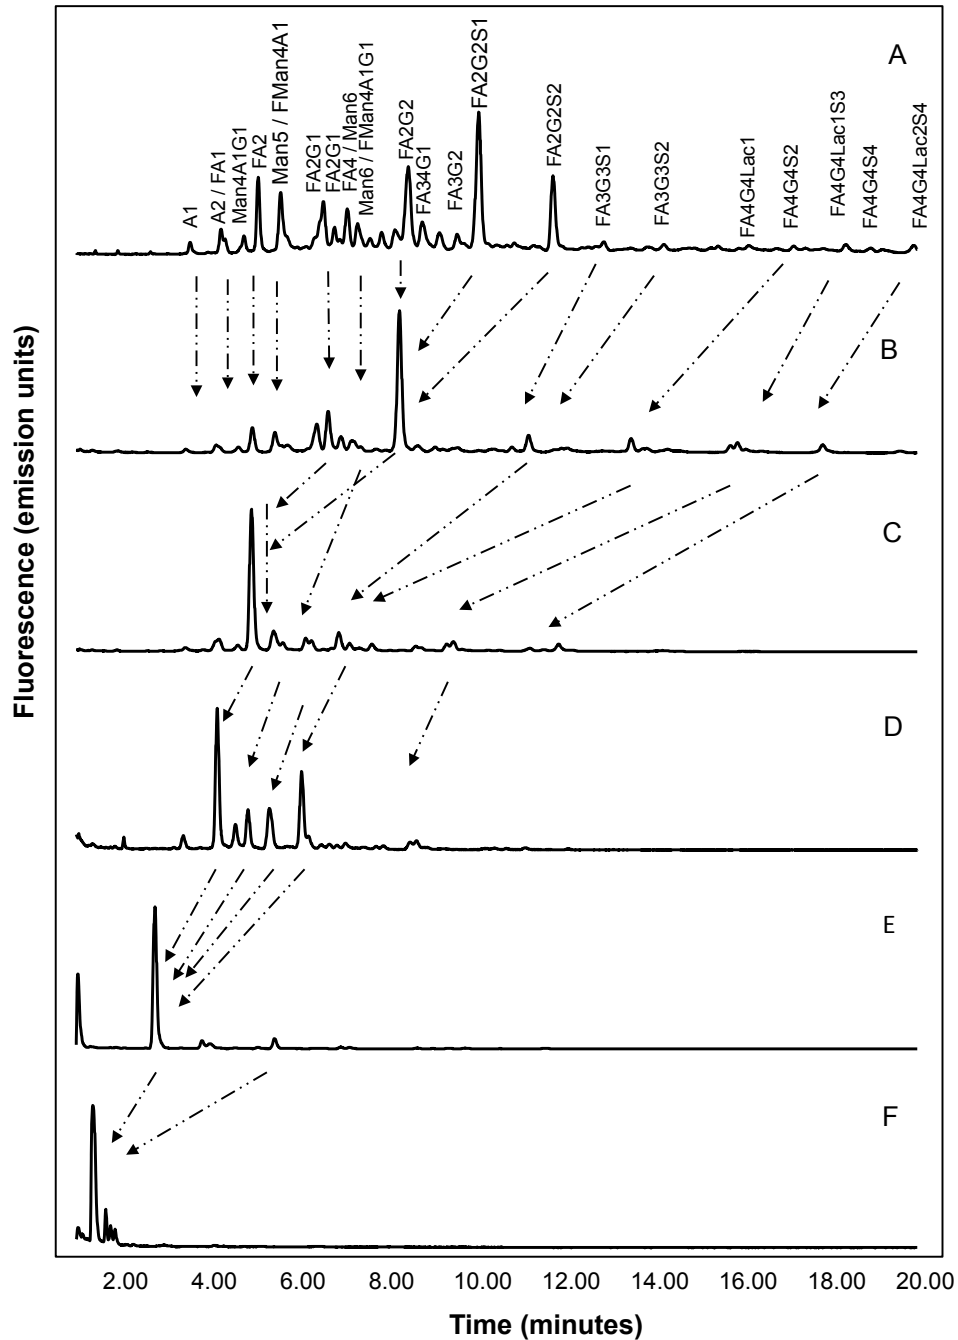

Figure 4. Exoglycosidase sequencing of the *FcγRIIIa*<sub>Phe158</sub> N-glycans

Arrows indicate the migrations of peaks following exoglycosidase digestion and HILIC UPLC analysis A. Undigested *FcγRIIIa*<sub>Phe158</sub> glycan profile B. *Arthrobacter ureafaciens* sialidase (ABS) C. bovine testes  $\beta$ -galactosidase (BTG) D. bovine kidney  $\alpha$ -fucosidase (BKF), E. jack bean  $\beta$ -N-acetylhexosaminidase (JBH), F. jack bean  $\alpha$ -mannosidase (JBM). Peaks migrate to Man<sub>1</sub> structures following digestion.

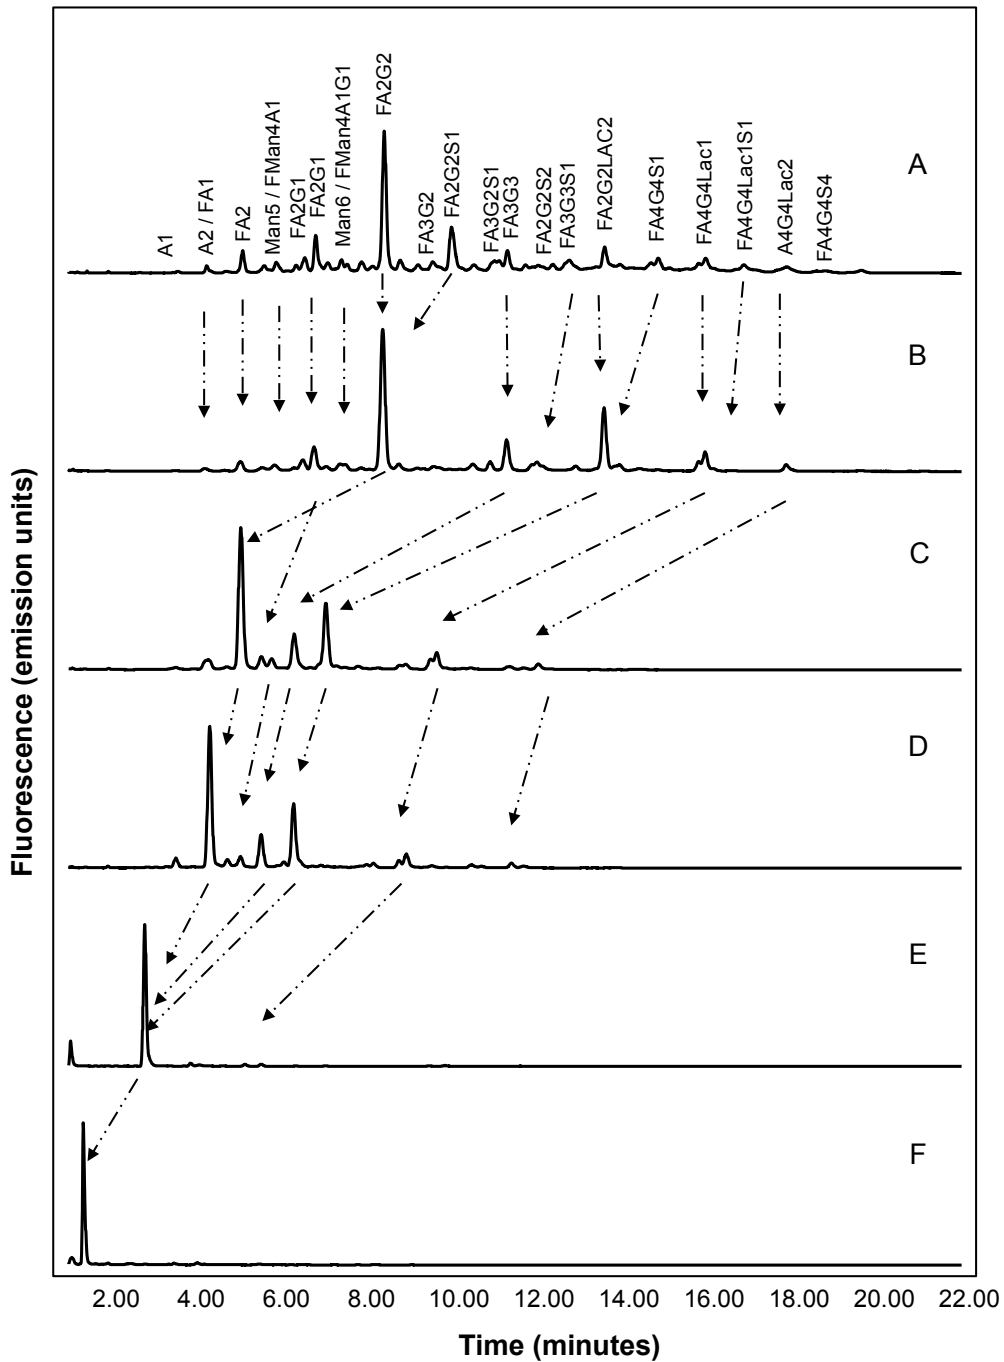

Figure 5. Exoglycosidase sequencing of the *FcγRIIIa* Val158 N-glycans

Arrows indicate the migrations of peaks following exoglycosidase digestion and HILIC UPLC analysis A. Undigested *FcγRIIIa* Val158 glycan profile B. *Arthrobacter ureafaciens* sialidase (ABS) C. bovine testes  $\beta$ -galactosidase (BTG) D. bovine kidney  $\alpha$ -fucosidase (BKF), E. jack bean  $\beta$ -N-acetylhexosaminidase (JBH), F. jack bean  $\alpha$ -mannosidase (JBM). Peaks migrate to Man<sub>1</sub> structures following digestion

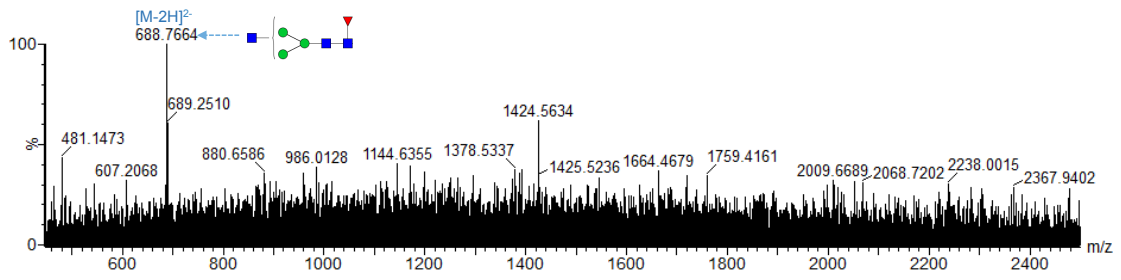

Figure 6. Mass spectrometry (UPLC/ESI-MS) identification of the N-glycan FA1 from Fc $\gamma$ R<sub>s</sub>

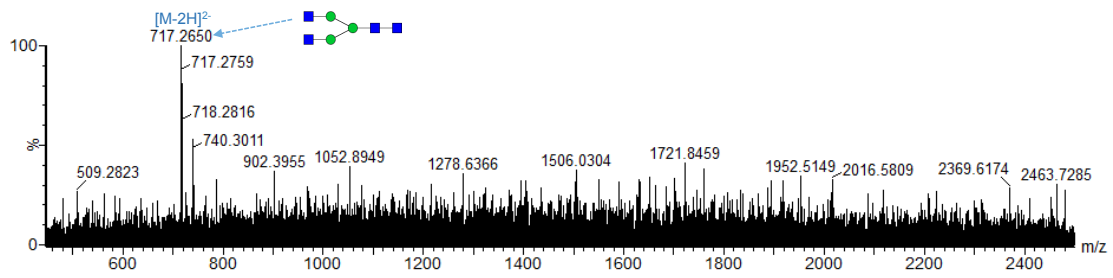

Figure 7. Mass spectrometry (UPLC/ESI-MS) identification of the N-glycan A2G2 from Fc $\gamma$ R<sub>s</sub>

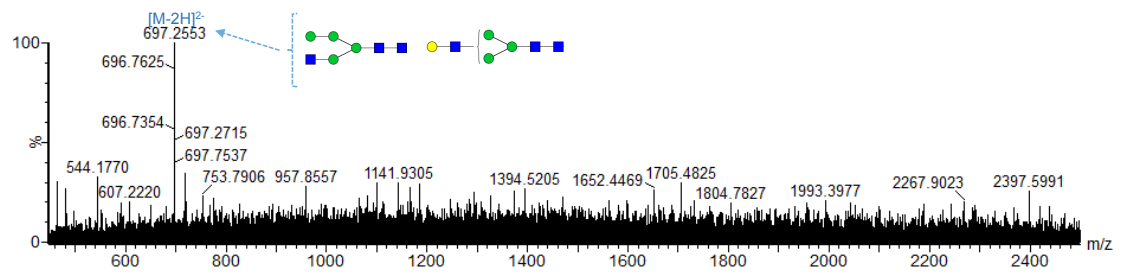

Figure 8. Mass spectrometry (UPLC/ESI-MS) identification of the N-glycans Man4A1 and A2G1 from Fc $\gamma$ R<sub>s</sub>

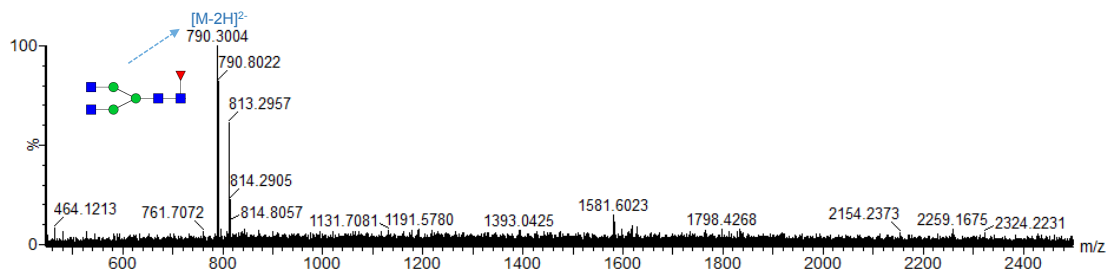

Figure 9. Mass spectrometry (UPLC/ESI-MS) identification of the N-glycans Man4A1 and A2G1 from Fc $\gamma$ R<sub>s</sub>

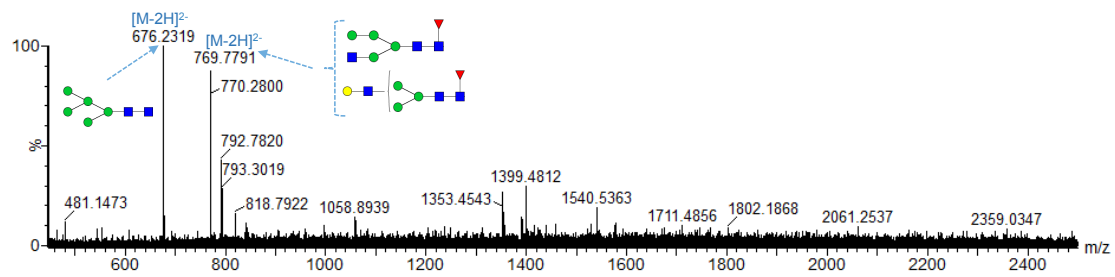

Figure 10. Mass spectrometry (UPLC/ESI-MS) identification of the N-glycans Man5, FMan4A1 and FA1G1 from FcγRs

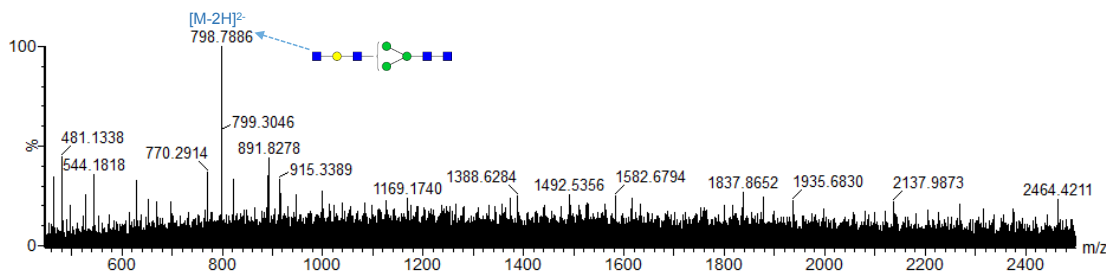

Figure 11. Mass spectrometry (UPLC/ESI-MS) identification of the N-glycan A1Lac1 from FcγRs

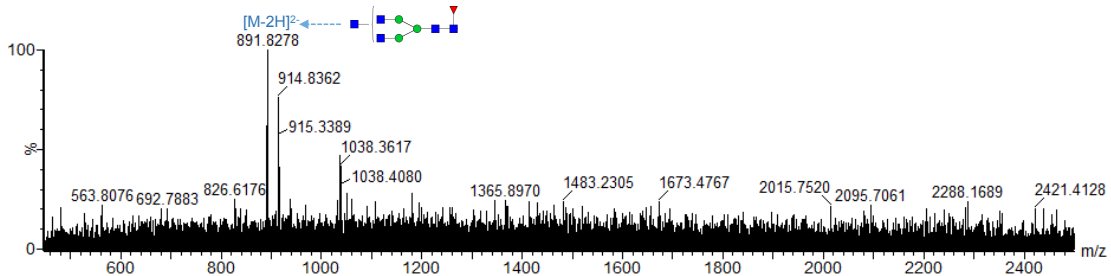

Figure 12. Mass spectrometry (UPLC/ESI-MS) identification of the N-glycan FA3 from FcγRs

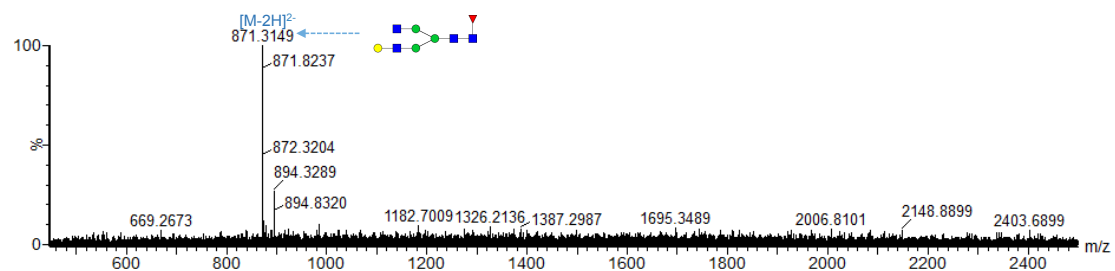

Figure 13. Mass spectrometry (UPLC/ESI-MS) identification of the N-glycan FA2(6)G1 from FcγRs

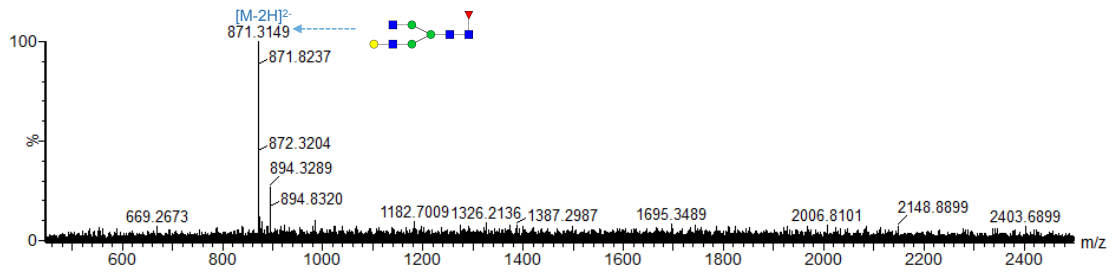

Figure 14. Mass spectrometry (UPLC/ESI-MS) identification of the N-glycan FA2(3)G1 from FcγRs

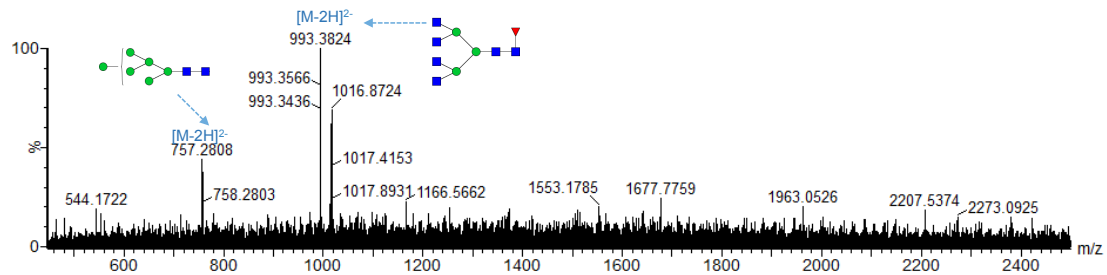

Figure 15. Mass spectrometry (UPLC/ESI-MS) identification of the N-glycans Man6 and FA4 from FcγRs

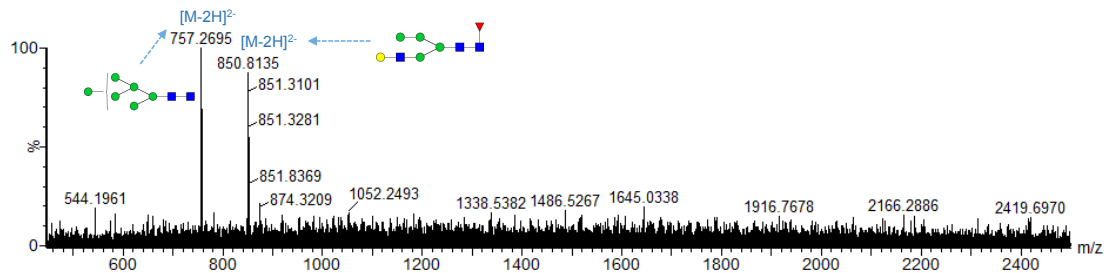

Figure 16. Mass spectrometry (UPLC/ESI-MS) identification of the N-glycans Man7 and FMan4A1G1 from FcγRs

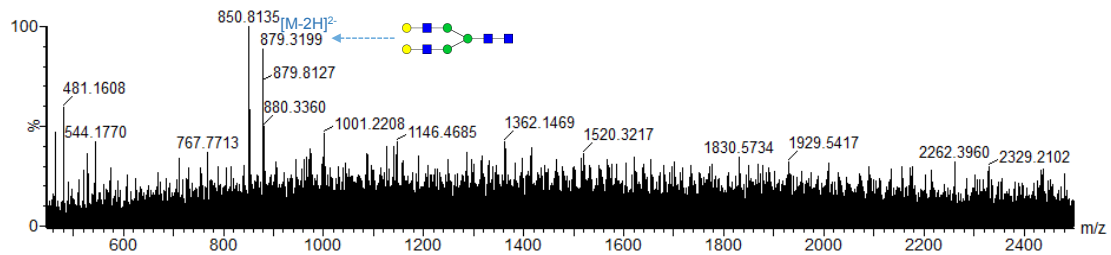

Figure 17. Mass spectrometry (UPLC/ESI-MS) identification of the N-glycan A2G2 from FcγRs



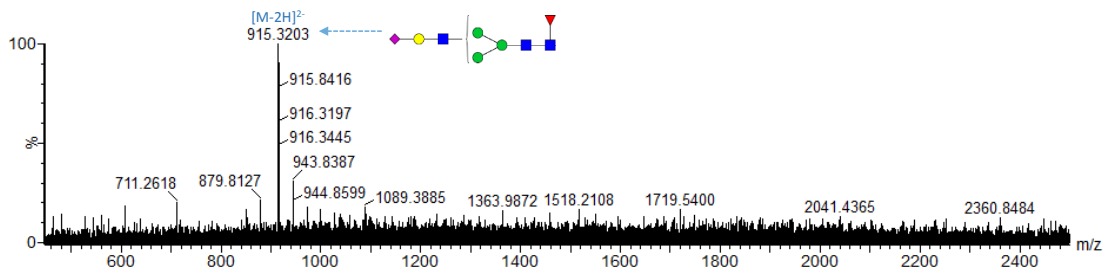

Figure 18. Mass spectrometry (UPLC/ESI-MS) identification of the N-glycan FA1G1S1 from FcγRs

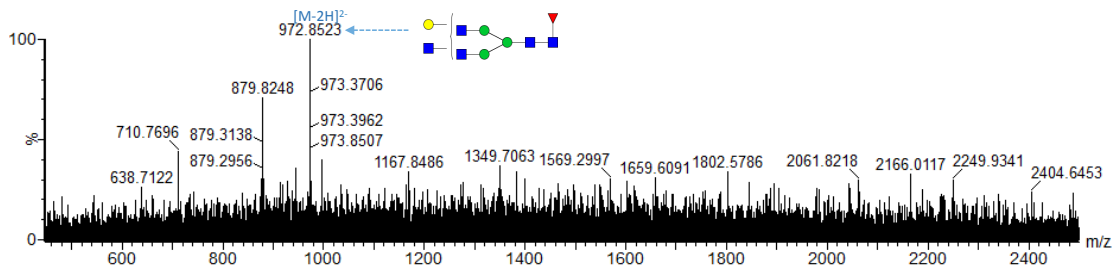

Figure 19. Mass spectrometry (UPLC/ESI-MS) identification of the N-glycan FA3G1 from FcγRs

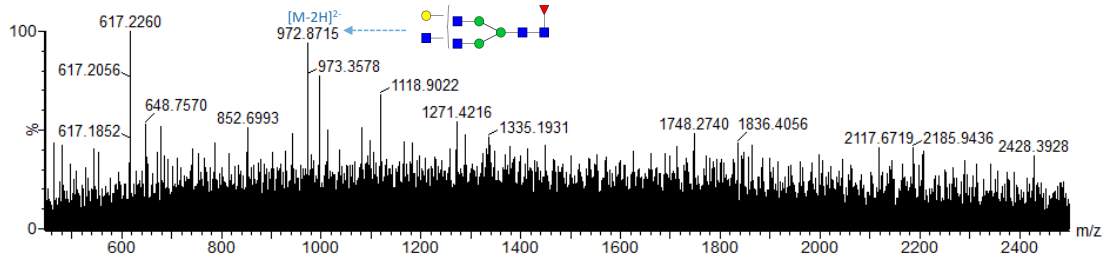

Figure 20.. Mass spectrometry (UPLC/ESI-MS) identification of the N-glycan FA2G1 from FcγRs

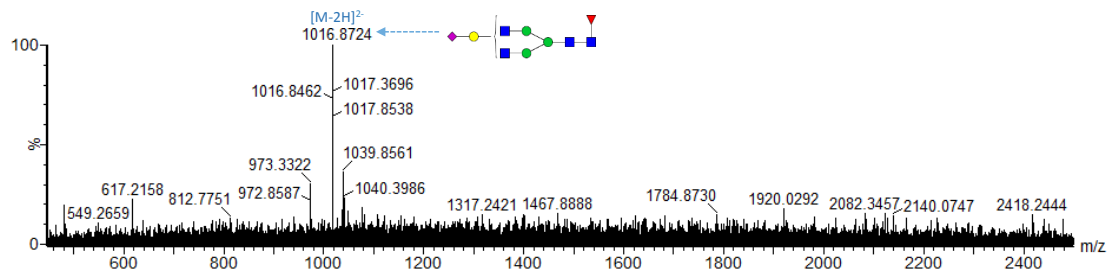

Figure 21. Mass spectrometry (UPLC/ESI-MS) identification of the N-glycan FA2G1S1 from FcγRs

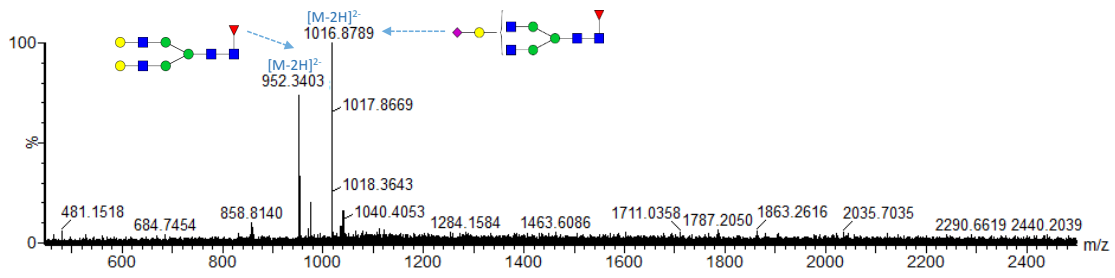

Figure 22. Mass spectrometry (UPLC/ESI-MS) identification of the N-glycans FA2G2 and FA2G1S1 from Fc $\gamma$ R<sub>s</sub>

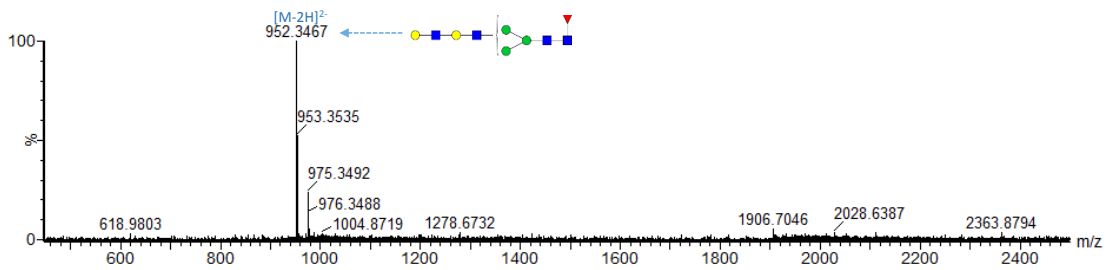

Figure 23. Mass spectrometry (UPLC/ESI-MS) identification of the N-glycan FA1G1Lac1 from Fc $\gamma$ R<sub>s</sub>

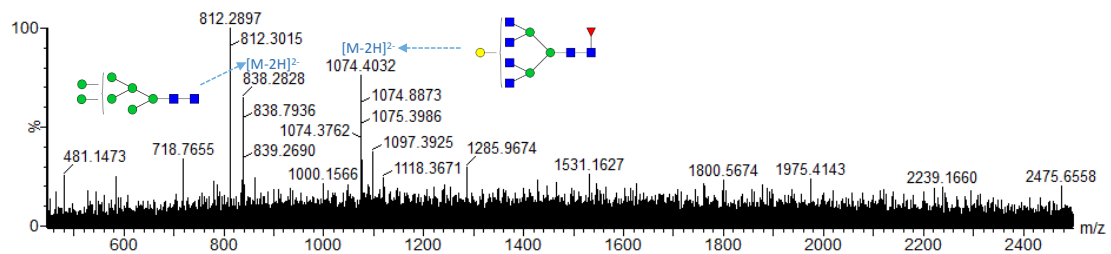

Figure 24. Mass spectrometry (UPLC/ESI-MS) identification of the N-glycans Man7 and FA4G1 from Fc $\gamma$ R<sub>s</sub>

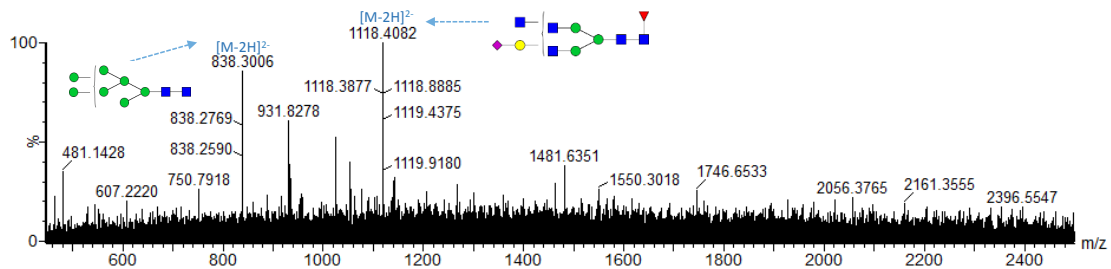

Figure 25. Mass spectrometry (UPLC/ESI-MS) identification of the N-glycans Man7 and FA3G1S1 from Fc $\gamma$ R<sub>s</sub>

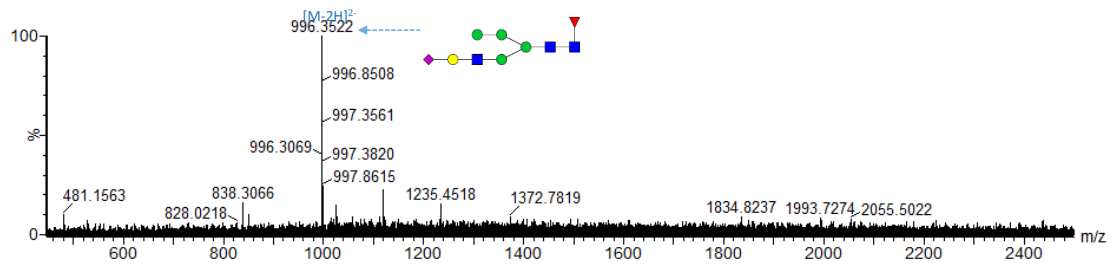

Figure 26. Mass spectrometry (UPLC/ESI-MS) identification of the N-glycan FMan4G1S1 from FcγRs

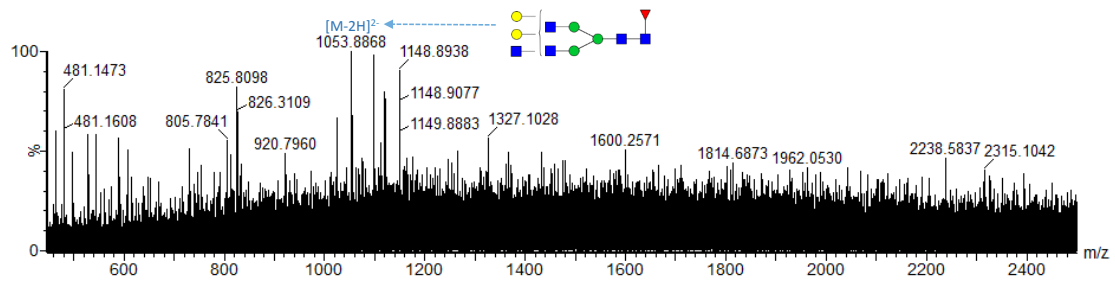

Figure 27. Mass spectrometry (UPLC/ESI-MS) identification of the N-glycan FA3G2 from FcγRs

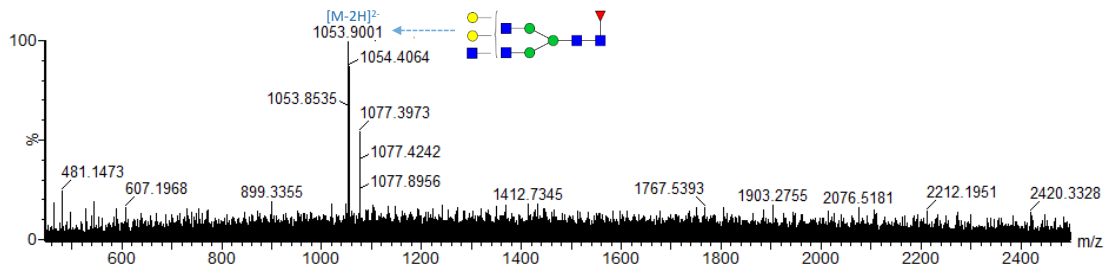

Figure 28. Mass spectrometry (UPLC/ESI-MS) identification of the N-glycan FA3G2 from FcγRs

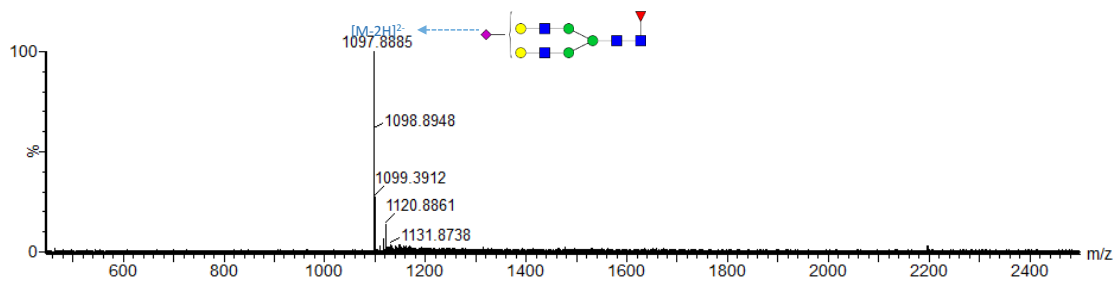

Figure 29. Mass spectrometry (UPLC/ESI-MS) identification of the N-glycan FA2G2S1 from FcγRs

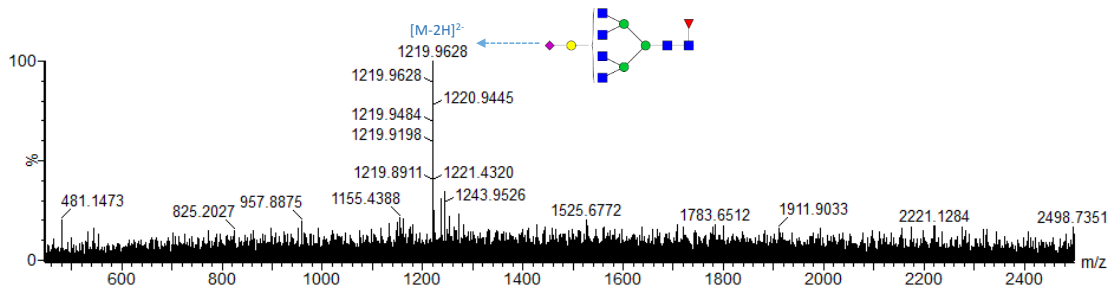

Figure 30. Mass spectrometry (UPLC/ESI-MS) identification of the N-glycan FA4G1S1 from FcγRs

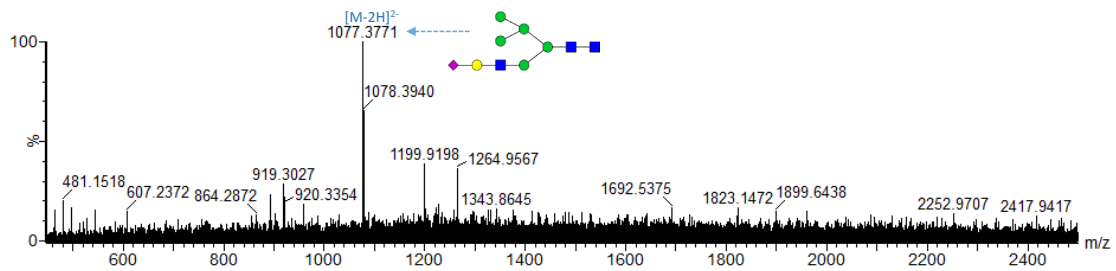

Figure 31. Mass spectrometry (UPLC/ESI-MS) identification of the N-glycan FMan5A1G1S1 from FcγRs

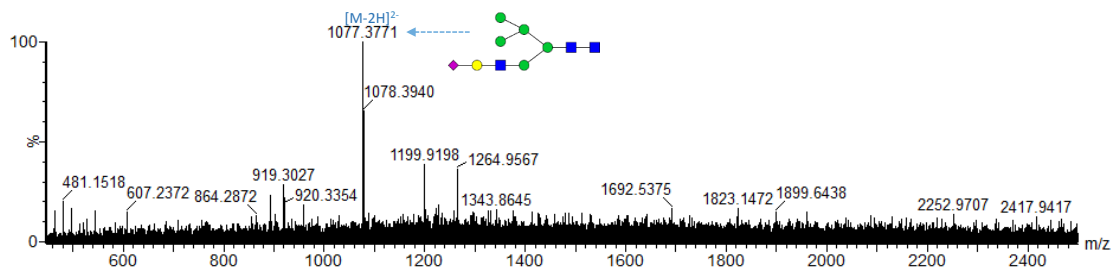

Figure 32. Mass spectrometry (UPLC/ESI-MS) identification of the N-glycan FA3G2S1 from FcγRs

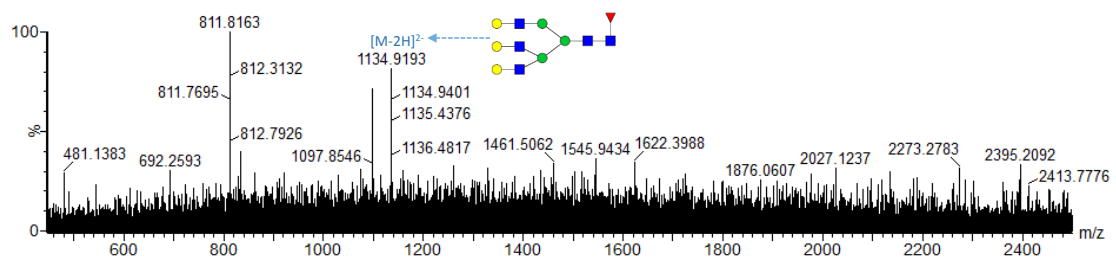

Figure 33. Mass spectrometry (UPLC/ESI-MS) identification of the N-glycan FA3G3 from FcγRs

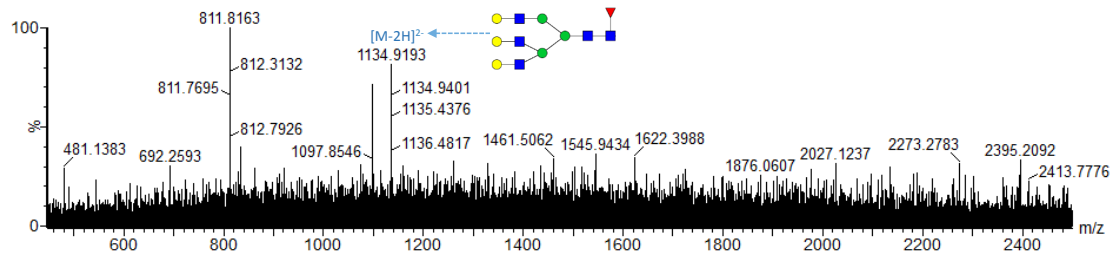

Figure 34. Mass spectrometry (UPLC/ESI-MS) identification of the N-glycan FAG3 from Fc $\gamma$ R<sub>s</sub>

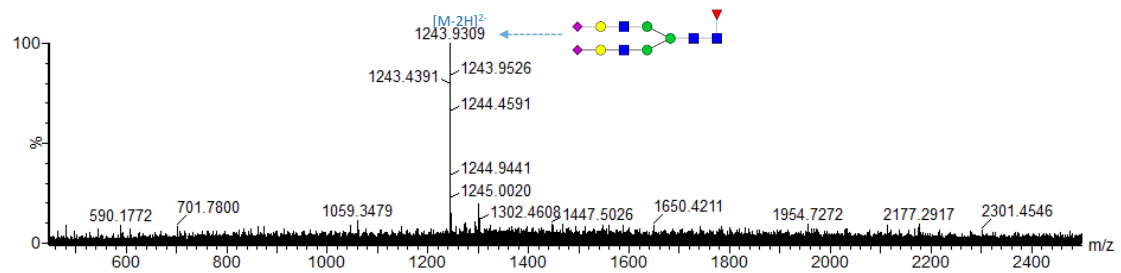

Figure 35. Mass spectrometry (UPLC/ESI-MS) identification of the N-glycan FA2G2S2 from Fc $\gamma$ R<sub>s</sub>

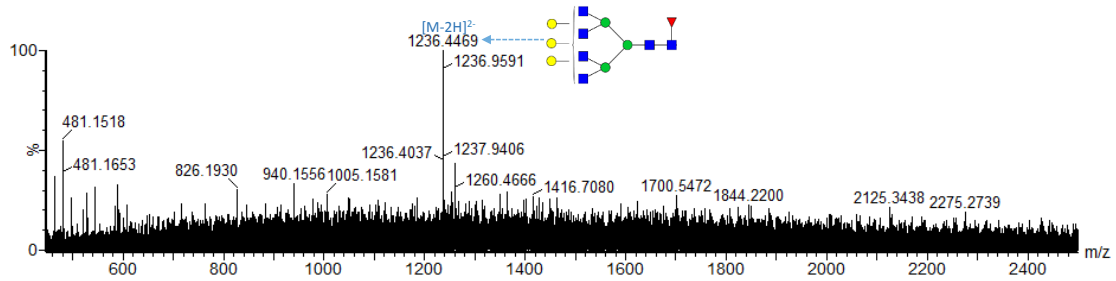

Figure 36. Mass spectrometry (UPLC/ESI-MS) identification of the N-glycan FA4G3 from Fc $\gamma$ R<sub>s</sub>

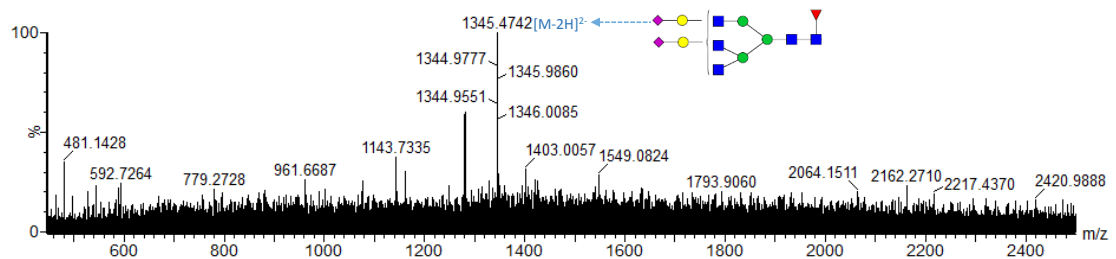

Figure 37. Mass spectrometry (UPLC/ESI-MS) identification of the N-glycan FA3G2S2 from Fc $\gamma$ R<sub>s</sub>

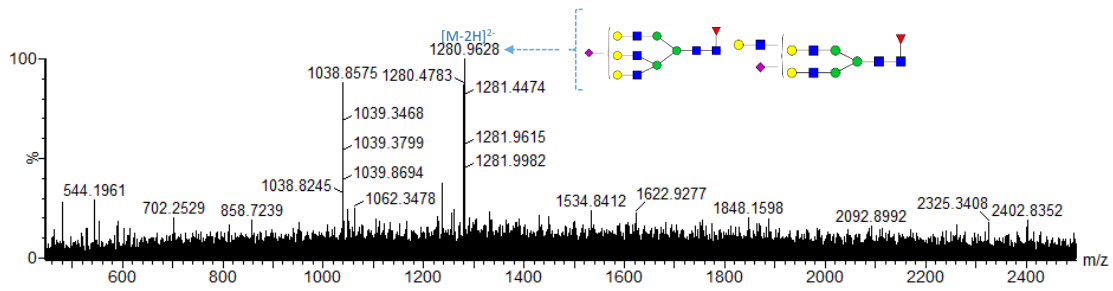

Figure 33. Mass spectrometry (UPLC/ESI-MS) identification of the N-glycans FA3G3S1 and FA2G2Lac1S1 from Fc $\gamma$ R<sub>s</sub>

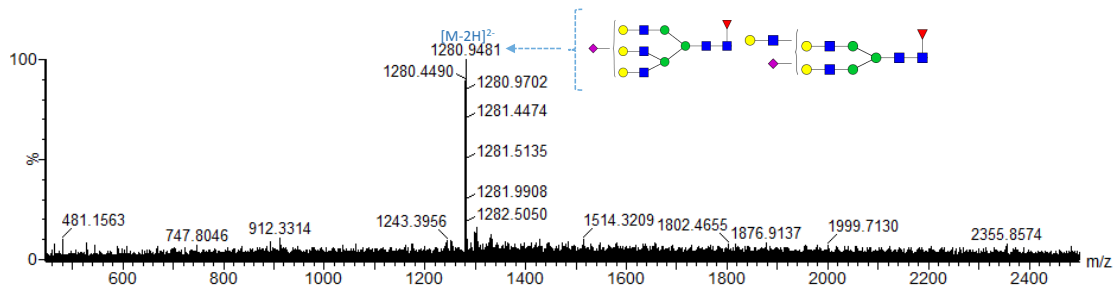

Figure 38. Mass spectrometry (UPLC/ESI-MS) identification of the N-glycans FA3G3S1 and FA2G2Lac1S1 from Fc $\gamma$ R<sub>s</sub>

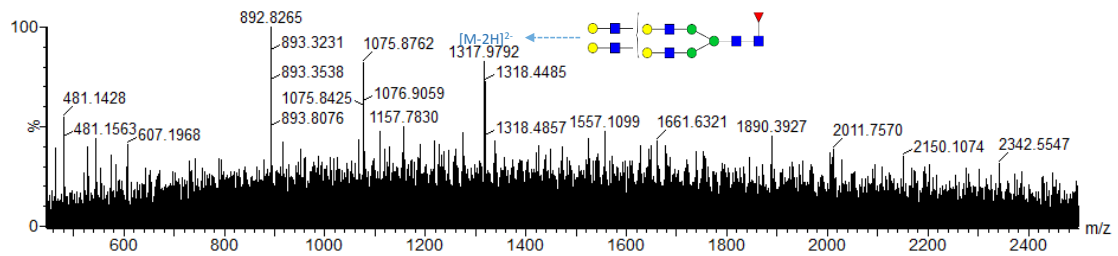

Figure 38. Mass spectrometry (UPLC/ESI-MS) identification of the N-glycan FA2G2Lac2 from Fc $\gamma$ R<sub>s</sub>

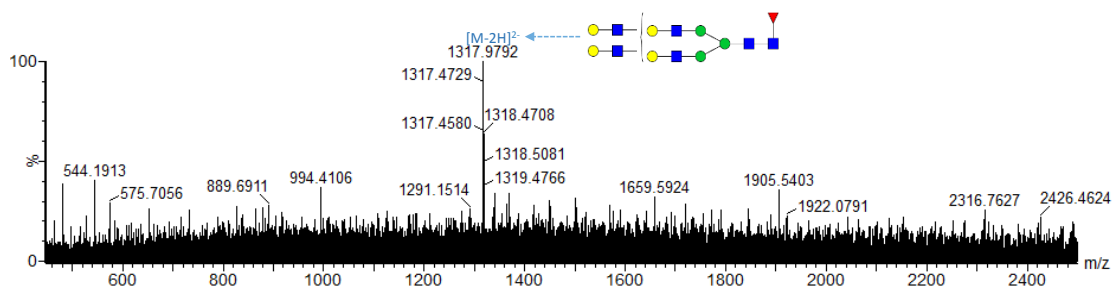

Figure 40. Mass spectrometry (UPLC/ESI-MS) identification of the N-glycan FA2G2Lac2 from Fc $\gamma$ R<sub>s</sub>

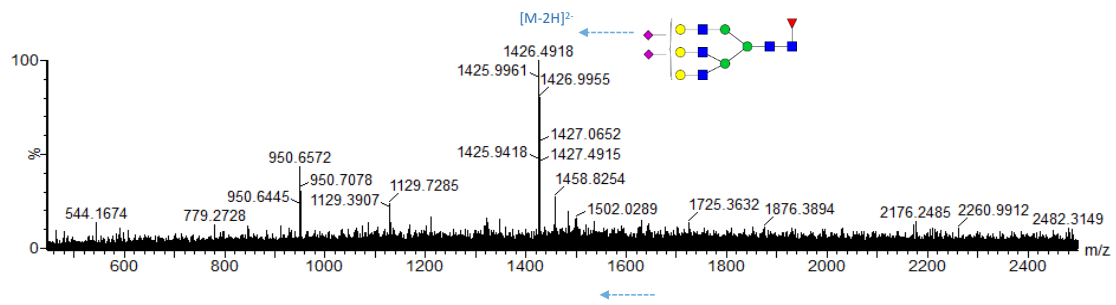

Figure 41. Mass spectrometry (UPLC/ESI-MS) identification of the N-glycan FA3G3S2 from Fc $\gamma$ R<sub>s</sub>

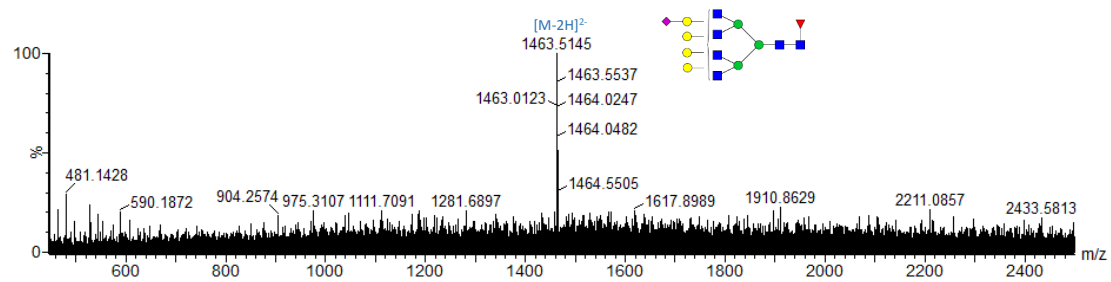

Figure 42. Mass spectrometry (UPLC/ESI-MS) identification of the N-glycan FA4G4S1 from Fc $\gamma$ R<sub>s</sub>

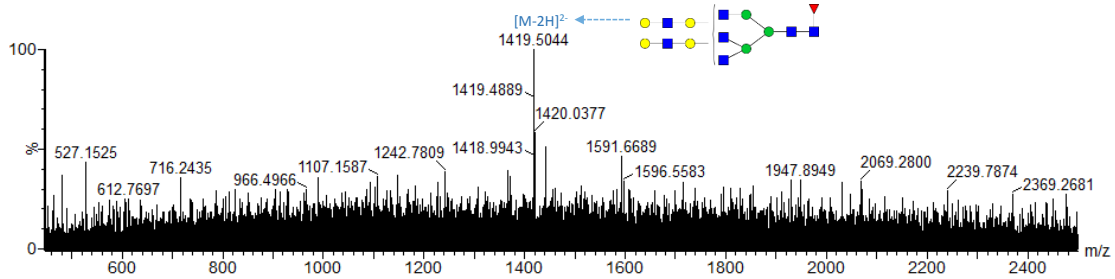

Figure 43. Mass spectrometry (UPLC/ESI-MS) identification of the N-glycan FA3G2Lac2 from Fc $\gamma$ R<sub>s</sub>

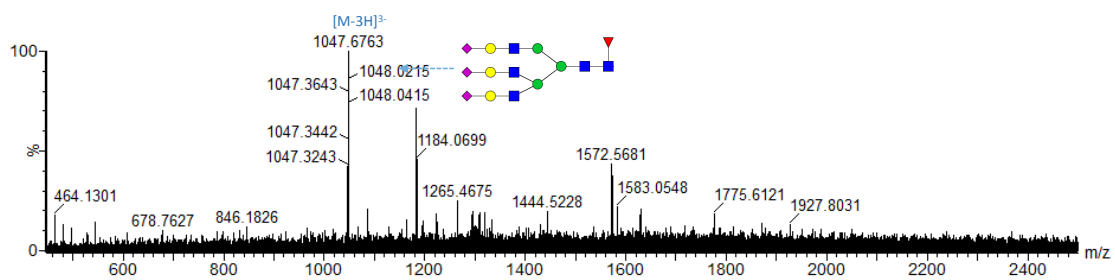

Figure 44. Mass spectrometry (UPLC/ESI-MS) identification of the N-glycan FA3G3S3 from FcγRs

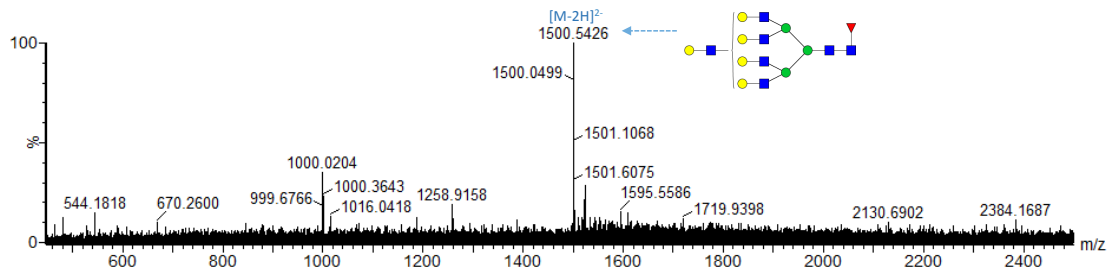

Figure 45. Mass spectrometry (UPLC/ESI-MS) identification of the N-glycan FA4G4Lac1 from FcγRs

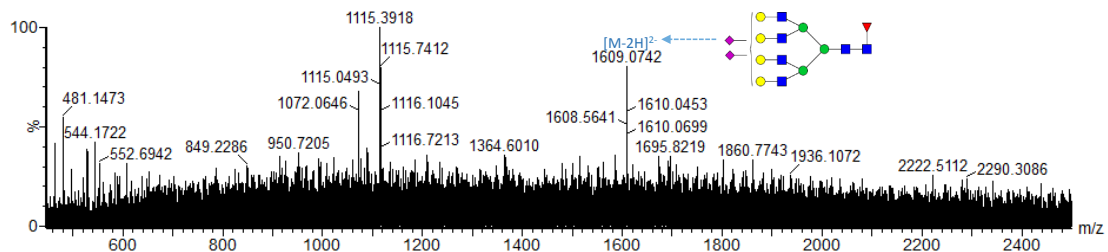

Figure 46. Mass spectrometry (UPLC/ESI-MS) identification of the N-glycan FA4G4S2 from FcγRs

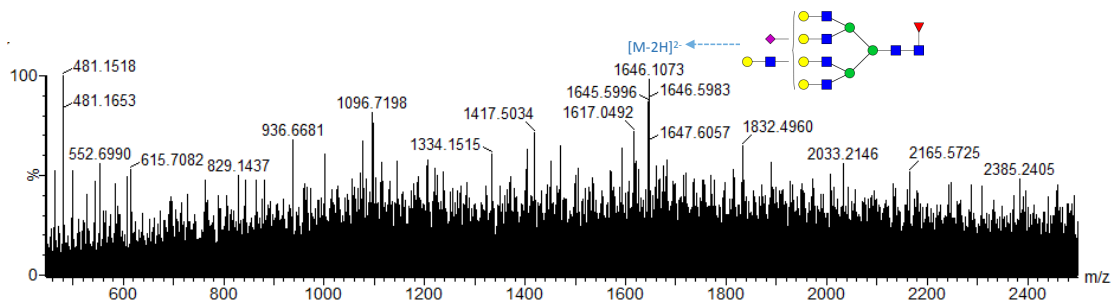

Figure 47. Mass spectrometry (UPLC/ESI-MS) identification of the N-glycan FA4G4Lac1S1 from FcγRs

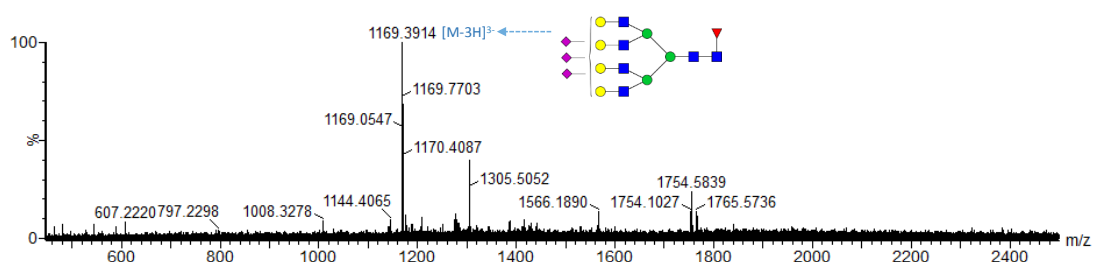

Figure 48. Mass spectrometry (UPLC/ESI-MS) identification of the N-glycan FA4G4S3 from FcγRs



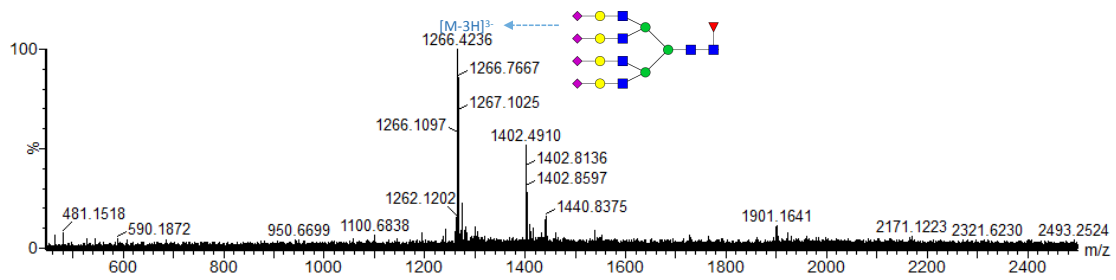

Figure 49. Mass spectrometry (UPLC/ESI-MS) identification of the N-glycan FA4G4S4 from Fc $\gamma$ R<sub>s</sub>

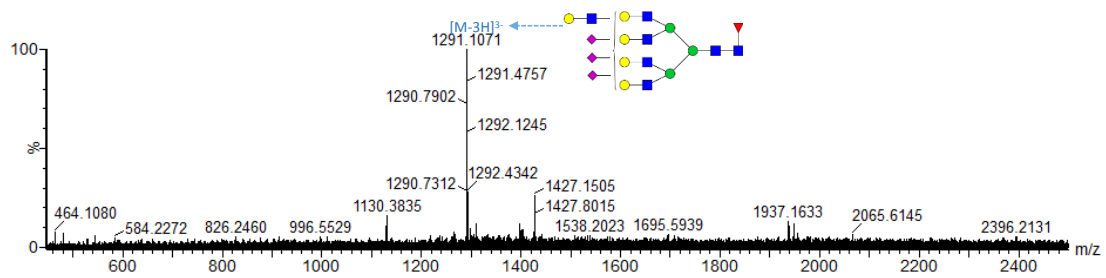

Figure 50. Mass spectrometry (UPLC/ESI-MS) identification of the N-glycan FA4G4Lac1S3 from Fc $\gamma$ R<sub>s</sub>

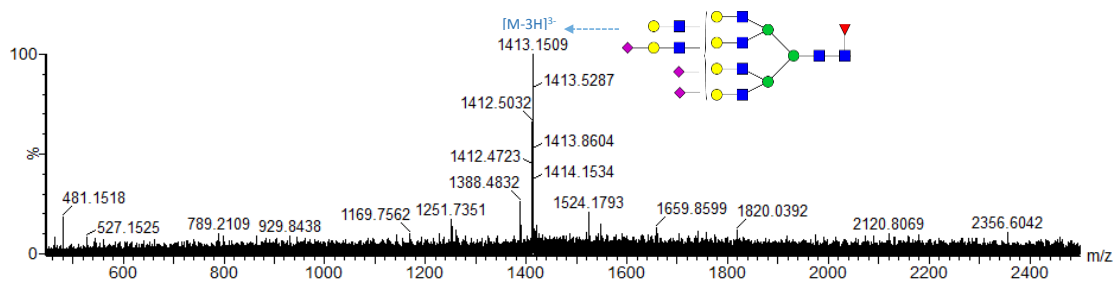

Figure 51. Mass spectrometry (UPLC/ESI-MS) identification of the N-glycan FA4G4Lac2S3 from Fc $\gamma$ R<sub>s</sub>

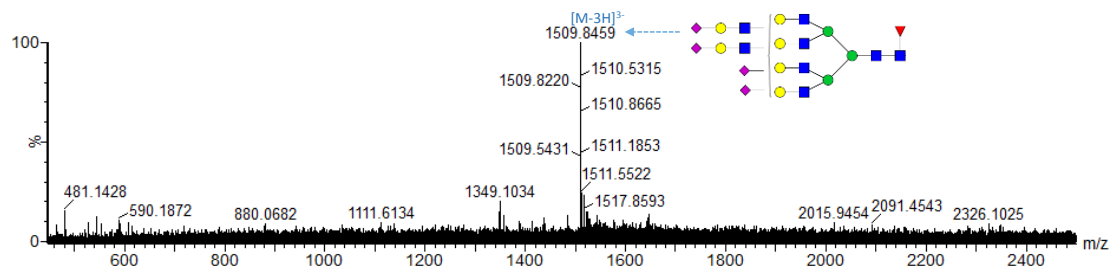

Figure 52. Mass spectrometry (UPLC/ESI-MS) identification of the N-glycan FA4G4Lac2S4 from Fc $\gamma$ R<sub>s</sub>
